# Supplementary material for: Photodecomposition of formohydroxamic acid. Matrix isolation FTIR and DFT studies
Source: Royal Society of Chemistry journal article supplement (doi:10.1039/b306785h), 2003-01-01
Supplement: b306785h.doc [file b306785h.doc]

Supplementary Material for PCCP

This journal is © The Owner Societies 2003

# Supplementary data

Table S1 Properties of the HNCO-H2O complexes calculated at the B3LYP level of theory employing the 6-311++G(2d,2p) basis seta

| Propertyb | Structure I | Structure II | Structure III |
| --- | --- | --- | --- |
| R(N···O) | 2.933 | 3.129 | 3.988 |
| R(O···O) |  |  | 3.659 |
| r(NH) | 1.017 | 1.007 | 1.007 |
| Δr(NH) | 0.012 | 0.002 | 0.002 |
| r(O-HA) | 0.962 | 0.965 | 0.962 |
| Δr(O-HA) | 0.001 | 0.004 | 0.001 |
| r(O-HB) | 0.962 | 0.960 | 0.961 |
| r(CN) | 1.206 | 1.214 | 1.210 |
| r(OC) | 1.169 | 1.162 | 1.167 |
| θ(CNH) | 127.7 | 124.1 | 122.0 |
| θ(OCN) | 173.4 | 173.2 | 173.2 |
| θ(HAOHB) | 105.7 | 105.5 | 105.5 |
| Θ(NH···O); Θ(OHA···N) | 176.5 | 154.9 | 101.8 |
| Θ(H···OHA); Θ(HA···NH) | 115.5 | 99.0 | 114.1 |
| Θ(H···OHB) | 116.2 |  | 138.6 |
| Φ(NH···OHA) | -53.2 | 6.55 | -162.4 |
| Φ(NH···OHB) | 71.6 |  | -0.4 |
| Φ(CO···HAO); Φ(CN···HAO) |  | -162.3 | -0.9 |
| Φ(HOH···N) |  | -152.1 |  |
|  |  |  |  |
| μ | 4.824 | 1.408 | 2.752 |
| ΔECP | -22.58 | -10.25 | -11.08 |
| ΔECP (ZPVE) | -15.18 | -4.81 | -6.69 |
|  |  |  |  |
| a The structures I and II are described in the paper. The calculations also indicated a stationary point corresponding to structure III involving two weak hydrogen bonds between oxygen atoms of HNCO, H2O molecules and between the OH, NH groups, respectively, of water and isocyanic molecules. One negative frequency was calculated for the structure III indicating that this complex corresponds to a saddle point on the potential energy surface.  b Bond lengths are in Å, angles in degrees, dipole moments in Debyes, energies in kJ∙mol-1. | | | |

Table S2 Properties of the NH2OH-CO complexes calculated at the B3LYP level of theory employing the 6-311++G(2d,2p) basis seta

| Propertyb | Structure I | Structure II | Structure III |
| --- | --- | --- | --- |
| R(O···C); R(O···O) | 3.253 |  | 3.319 |
| R(N···C) |  | 3.350 |  |
| r(OH) | 0.965 | 0.961 | 0.962 |
| Δr(OH) | 0.004 | 0.000 | 0.001 |
| r(C-O) | 1.124 | 1.126 | 1.126 |
| Δr(C-O) | 0.001 | 0.001 | 0.001 |
| r(NO) | 1.443 | 1.446 | 1.445 |
| r(NHA); r(NHB) | 1.016 | 1.016 | 1.016 |
| θ(NOH) | 102.3 | 102.7 | 102.6 |
| θ(ONHA); θ(ONHB) | 104.1 | 104.1 | 103.9 |
| Θ(OH···C); Θ(OH···O) | 152.8 | 154.9 | 172.5 |
| Θ(H···CO); Θ(H···OC) | 163.7 | 99.0 | 165.0 |
| Θ(NHA···C) |  | 98.7 |  |
| Θ(NHB···C) |  | 93.1 |  |
| Θ(N···CO) |  | 150.1 |  |
| Φ(OH···CO); Φ(OH···OC) | -0.8 |  | 2.55 |
| Φ(NOH···C); Φ(NOH···O) | 0.3 |  | -9.3 |
| Φ(OC···NO); Φ(CN···HAO) |  | 163.3 |  |
| Φ(OC···NHA) |  | 113.7 |  |
| Φ(OC···NHB) |  | -126.0 |  |
|  |  |  |  |
| μ | 0.779 | 0.813 | 0.578 |
| ΔECP | -6.69 | -1.67 | -2.01 |
| ΔECP (ZPVE) | -2.76 | -0.21 | -0.12 |
|  |  |  |  |
| a The structures I and II are described in the paper. The calculations also indicated existence of a stationary point corresponding to the structure III that involves a weak hydrogen bond between the OH group of hydroxylamine and oxygen atom of CO molecule. One negative frequency was calculated for the structure III indicating that this complex corresponds to a saddle point on the potential energy surface  b Bond lengths are in Å, angles in degrees, dipole moments in Debyes, energies in kJ∙mol-1. | | | |

**Table S3 The frequencies and frequency shifts (cm-1) of the HNCO-H2O complexes**

**calculated at the B3LYP/6-311++G(2d,2p) level of theorya.**

| Monomer | Structure I  H2O···HNCO | | Structure II  HOH···N(H)CO | | Structure III  HNCO···H2O | | Assignment |
| --- | --- | --- | --- | --- | --- | --- | --- |
| ν | ν | Δν | ν | Δν | ν | Δν |
| H2O |  |  |  |  |  |  |  |
| 3925 (62) | 3913 (90) | -12 | 3900 (124) | -25 | 3916 (74) | -9 | νas(OH) |
| 3824 (83) | 3814 (18) | -10 | 3766 (177) | -58 | 3815 (84) | -9 | νs(OH) |
| 1639 (71) | 1642 (72) | +3 | 1648 (41) | +9 | 1640 (114) | +1 | δ(HOH) |
| HNCO |  |  |  |  |  |  |  |
| 3688 (164) | 3454 (989) | -234 | 3656 (162) | -32 | 3661 (156) | -27 | ν(NH) |
| 2316 (759) | 2317(788) | +1 | 2317 (837) | +1 | 2311 (715) | -5 | νas(NCO) |
| 1328 (10) | 1331 (11) | +3 | 1327 (0) | -1 | 1325 (67) | -3 | νs(NCO) |
| 803 (215) | 878 (288) | +75 | 864 (234) | +61 | 849 (239) | +46 | δ(HNC) |
| 637 (2) | 706 (35) | +69 | 633 (3) | -4 | 634 (4) | -3 | τ(NH) |
| 581 (76) | 643 (12) | +62 | 608 (44) | +27 | 568 (67) | -13 | δ(NCO) |
|  | 705 (34) |  | 91 (151) |  | 255 (224) |  | HNCO def. o. o. pl. |
|  | 236 (233) |  | 275 (154) |  | 203 (75) |  | H2O def. in pl. |
|  | 194 (2) |  | 389 (133) |  | 172 (44) |  | H2O def. out of pl.; OHass def. |
|  | 164 (9) |  | 115 (11) |  | 97 (2) |  | Stretch |
|  | 71 (6) |  | 18 (28) |  | 27 (19) |  | HNCO def. in pl. |
|  | 57 (44) |  | 49 (41) |  | -23 (111) |  | H2O twist.; OHfree def. |

a the numbers in parentheses are the IR intensities expressed in km mol-1

**Table S4 The frequencies and frequency shifts (cm-1) of the NH2OH-CO complexes calculated at the B3LYP/6-311++G(2d,2p) level of theorya.**

| Monomer | Structure I  NH2OH···CO | | Structure II  HONH2···CO | | Structure III  NH2OH···OC | | Assignment |
| --- | --- | --- | --- | --- | --- | --- | --- |
| ν | ν | Δν | ν | Δν | ν | Δν |
| CO |  |  |  |  |  |  |  |
| 2210 (82) | 2222 (87) | +12 | 2216 (93) | +6 | 2206 (104) | -4 | ν(CO) |
| NH2OH |  |  |  |  |  |  |  |
| 3833 (46) | 3773 (184) | -60 | 3830 (47) | -3 | 3832 (117) | -1 | ν(OH) |
| 3532 (3) | 3531 (3) | -1 | 3537 (4) | +5 | 3531 (3) | -1 | νas(NH2) |
| 3457 (2) | 3458 (2) | +1 | 3463 (2) | +6 | 3456 (2) | -1 | νs(NH2) |
| 1671 (17) | 1672 (17) | +1 | 1666 (19) | -5 | 1672 (15) | +1 | δ(NH2) |
| 1405 (27) | 1439 (22) | +34 | 1406 (27) | +1 | 1418 (25) | +13 | δ(OH) |
| 1330 (0) | 1326 (0) | -4 | 1324 (0) | -6 | 1328 (0) | -2 | r(NH2) |
| 1151 (129) | 1154 (125) | +3 | 1158 (137) | +7 | 1153 (124) | +2 | ω(NH2) |
| 929 (13) | 931 (10) | +2 | 928 (14) | -1 | 930 (13) | +1 | ν(NO) |
| 426 (176) | 531 (120) | +105 | 427 (170) | +1 | 462 (156) | +36 | τ(OH) |
|  | 190 (15) |  | 24 (1) |  | 113 (4) |  | NH2OH def o. o. pl. |
|  | 146 (1) |  | 95 (0) |  | -8 (0) |  | CO def. in pl. |
|  | 122 (0) |  | 55 (0) |  | 53 (0) |  | Stretch |
|  | 72 (0) |  | 58 (0) |  | 29 (0) |  | CO def. out of pl. |
|  | 32 (0) |  | 3 (0) |  | 77 (0) |  | NH2OH def. in pl. |

a the numbers in parentheses are the IR intensities expressed in km·mol-1
